# Supplementary material for: Depression in Central and Eastern Europe: How Much It Costs? Cost of Depression in Romania
Source: MDPI journal article supplement (doi:10.3390/healthcare11060921), 2023-03-22
Supplement: s1 [file s1]

Table S1. Components of depression costs

| Year                             | 2015                  | 2016                  | 2017                  | 2018                  | 2019                  | 2020                  | 2021                  |
|----------------------------------|-----------------------|-----------------------|-----------------------|-----------------------|-----------------------|-----------------------|-----------------------|
| <b>Direct costs</b>              |                       |                       |                       |                       |                       |                       |                       |
| Total number of cases N          | 277,317               | 306,290               | 343,171               | 378,447               | 404,935               | 394,860               | 435,772               |
| Primary care (€)<br>(%)          | 17,954<br>(0.04)      | 14,144<br>(0.03)      | 12,289<br>(0.02)      | 15,274<br>(0.02)      | 16,887<br>(0.03)      | 32,717<br>(0.07)      | 22,155<br>(0.05)      |
| Specialty outpatients (€)<br>(%) | 3,394,070<br>(7.78)   | 4,700,617<br>(11.51)  | 5,682,662<br>(9.73)   | 6,431,881<br>(10.40)  | 7,184,106<br>(11.54)  | 7,774,020<br>(17.68)  | 8,785,719<br>(18.87)  |
| Psychotherapy (€)<br>(%)         | 1,080,655<br>(2.48)   | 1,376,534<br>(3.37)   | 1,720,490<br>(2.94)   | 1,954,258<br>(3.16)   | 2,297,732<br>(3.69)   | 2,434,415<br>(5.54)   | 2,903,538<br>(6.24)   |
| Hospitalization (€)<br>(%)       | 15,988,568<br>(36.67) | 17,650,718<br>(43.24) | 33,874,380<br>(57.97) | 36,160,237<br>(58.48) | 35,187,675<br>(56.51) | 15,061,283<br>(34.26) | 15,351,484<br>(32.97) |
| Medications (€)<br>(%)           | 23,120,678<br>(53.03) | 17,081,027<br>(41.84) | 17,139,546<br>(29.33) | 17,268,898<br>(27.93) | 17,578,008<br>(28.23) | 18,661,982<br>(42.45) | 19,505,236<br>(41.89) |
| Total of direct costs (€)        | 43,601,925            | 40,823,040            | 58,429,367            | 61,830,548            | 62,264,408            | 43,964,417            | 46,568,132            |
| Average<br>cost/patient/year (€) | 158                   | 133                   | 170                   | 164                   | 155                   | 112                   | 108                   |
| <b>Indirect costs (€)</b>        |                       |                       |                       |                       |                       |                       |                       |
| Number of sick leave             | 1,627,940             | 1,822,354             | 1,936,336             | 2,419,404             | 2,461,103             | 2,543,280             | 687,784               |
| Sick leave (€)                   | 301,512,782           | 363,438,423           | 431,847,125           | 629,324,610           | 763,943,807           | 920,210,070           | 251,938,419           |
| Average<br>cost/patient/year (€) | 185                   | 199                   | 223                   | 260                   | 310                   | 362                   | 366                   |
| Sick leave cost/direct<br>cost   | 10.8                  | 8.9                   | 7.4                   | 10.2                  | 12.3                  | 18.4                  | 5.4                   |
| <b>Number of deaths</b>          |                       |                       |                       |                       |                       |                       |                       |
| Number of deaths<br>(%)          | 5032<br>(1.81)        | 10237<br>(3.34)       | 14857<br>(4.33)       | 19445<br>(5.14)       | 23443<br>(5.79)       | 31932<br>(8.09)       | 38394<br>(8.81)       |
| Cost of productivity loss<br>(€) | 933,190,960           | 523,154,870           | 1,660,755,924         | 1,147,827,402         | 1,500,965,020         | 1,869,221,934         | 2,455,305,818         |

Table S2. Corelation matrix (Pearson (n))

| Variables                          | Number of primary care | Number of specialty outpatients | Number of psychotherapy services | Number of hospitalizati on days | Number of sick leave | Number of Medical prescriptions | Cost of primary care (€) | Cost of specialty outpatients (€) | Cost of psychotherapy services (€) | Cost of hospitalizatin (€) | Cost of medications (€) | Cost of sick leave (€) | Cost of productivity loss (€) |
|------------------------------------|------------------------|---------------------------------|----------------------------------|---------------------------------|----------------------|---------------------------------|--------------------------|-----------------------------------|------------------------------------|----------------------------|-------------------------|------------------------|-------------------------------|
| Number of primary care             | <b>1</b>               | -0.104                          | -0.107                           | -0.437                          | -0.000               | -0.258                          | <b>0.735</b>             | -0.165                            | -0.138                             | <b>-0.799</b>              | 0.648                   | 0.135                  | -0.021                        |
| Number of specialty outpatients    | -0.104                 | <b>1</b>                        | <b>0.997</b>                     | -0.783                          | -0.132               | <b>0.980</b>                    | 0.573                    | <b>0.995</b>                      | <b>0.998</b>                       | -0.027                     | -0.264                  | 0.360                  | <b>0.866</b>                  |
| Number of psychotherapy services   | -0.107                 | <b>0.997</b>                    | <b>1</b>                         | <b>-0.783</b>                   | -0.184               | <b>0.974</b>                    | 0.559                    | <b>0.989</b>                      | <b>0.999</b>                       | -0.049                     | -0.229                  | 0.312                  | <b>0.877</b>                  |
| Number of hospitalization days     | -0.437                 | <b>-0.783</b>                   | <b>-0.783</b>                    | <b>1</b>                        | 0.324                | -0.661                          | <b>-0.833</b>            | <b>-0.749</b>                     | <b>-0.762</b>                      | 0.576                      | -0.080                  | -0.167                 | <b>-0.780</b>                 |
| Number of sick leave               | -0.000                 | -0.132                          | -0.184                           | 0.324                           | <b>1</b>             | -0.035                          | 0.086                    | -0.083                            | -0.152                             | 0.507                      | -0.410                  | 0.854                  | -0.342                        |
| Number of Medical prescriptions    | -0.258                 | <b>0.980</b>                    | <b>0.974</b>                     | -0.661                          | -0.035               | <b>1</b>                        | 0.451                    | <b>0.989</b>                      | <b>0.983</b>                       | 0.167                      | -0.372                  | 0.409                  | <b>0.839</b>                  |
| Cost of primary care (€)           | <b>0.735</b>           | 0.573                           | 0.559                            | <b>-0.833</b>                   | 0.086                | 0.451                           | <b>1</b>                 | 0.530                             | 0.540                              | -0.579                     | 0.258                   | 0.506                  | 0.512                         |
| Cost of specialty outpatients (€)  | -0.165                 | <b>0.995</b>                    | <b>0.989</b>                     | <b>-0.749</b>                   | -0.083               | <b>0.989</b>                    | 0.530                    | <b>1</b>                          | <b>0.994</b>                       | 0.036                      | -0.353                  | 0.389                  | <b>0.842</b>                  |
| Cost of psychotherapy services (€) | -0.138                 | <b>0.998</b>                    | <b>0.999</b>                     | <b>-0.762</b>                   | -0.152               | <b>0.983</b>                    | 0.540                    | <b>0.994</b>                      | <b>1</b>                           | -0.008                     | -0.265                  | 0.336                  | <b>0.870</b>                  |
| Cost of hospitalization (€)        | <b>-0.799</b>          | -0.027                          | -0.049                           | 0.576                           | 0.507                | 0.167                           | -0.579                   | 0.036                             | -0.008                             | <b>1</b>                   | -0.574                  | 0.3006                 | -0.087                        |
| Cost of medications (€)            | 0.648                  | -0.264                          | -0.229                           | -0.080                          | -0.410               | -0.372                          | 0.258                    | -0.353                            | -0.265                             | -0.574                     | <b>1</b>                | -0.373                 | 0.006                         |
| Cost of sick leave (€)             | 0.135                  | 0.360                           | 0.312                            | -0.167                          | 0.854                | 0.409                           | 0.506                    | 0.389                             | 0.336                              | 0.300                      | -0.373                  | <b>1</b>               | 0.121                         |
| Cost productivity loss (€)         | -0.021                 | <b>0.866</b>                    | <b>0.877</b>                     | <b>-0.780</b>                   | -0.342               | <b>0.839</b>                    | 0.512                    | <b>0.842</b>                      | <b>0.870</b>                       | -0.087                     | 0.006                   | 0.121                  | <b>1</b>                      |
